# Supplementary material for: Realizing high-brightness and ultra-wide-color-gamut laser-driven backlighting by using laminated phosphor-in-glass (PiG) films
Source: Royal Society of Chemistry journal article supplement (doi:10.1039/c9tc05807a), 2019-12-02
Supplement: c9tc05807a1.pdf [file c9tc05807a1.pdf]

## Electronic Supplementary Information

### Realizing High-Brightness and Ultra-wide Color Gamut Laser-Driven Backlighting by Using Laminated Phosphor-in-Glass (PiG) Films

Le Wang,<sup>\*a</sup> Ran Wei,<sup>a</sup> Peng Zheng,<sup>b</sup> Shihai You,<sup>b</sup> Tian-Liang Zhou,<sup>b</sup> Wei Yi,<sup>c</sup> Takashi Takeda,<sup>d</sup> Naoto Hirosaki,<sup>d</sup> and Rong-Jun Xie<sup>\*b</sup>

- a. College of Optical and Electronic Technology, China Jiliang University, Hangzhou, Zhejiang, 310018, P. R. China. Email: [calla@cju.edu.cn](mailto:calla@cju.edu.cn)
- b. College of Materials, Xiamen University, Xiamen 361005, P. R. China Email: [rjxie@xmu.edu.cn](mailto:rjxie@xmu.edu.cn)
- c. Nano Electronics Device Materials Group, National Institute for Materials Science (NIMS), Tsukuba, Ibaraki 305-0035, Japan
- d. Sialon Group, National Institute for Materials Science (NIMS), Tsukuba, Ibaraki 305-0035, Japan.

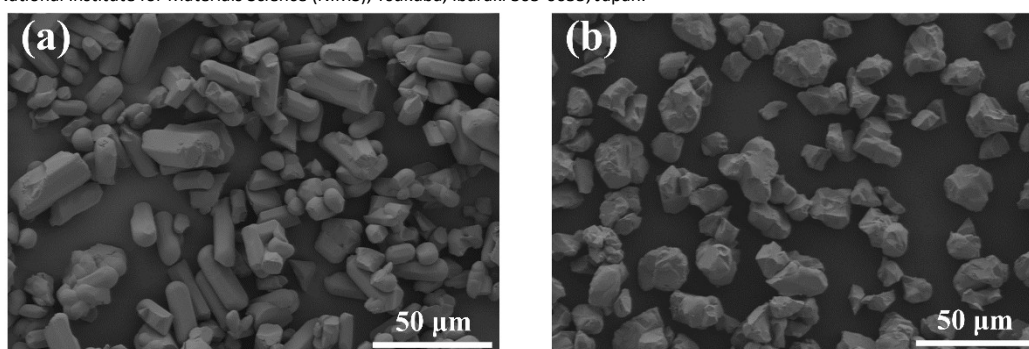

Fig. S1 SEM images of the  $\beta$ -Sialon and the Calson phosphor particles.

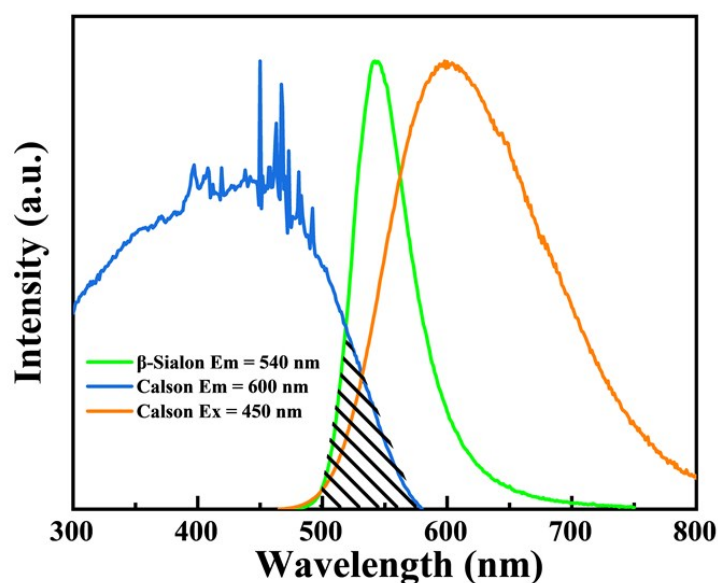

Fig. S2 Normalized PL and PLE spectra of  $\beta$ -Sialon and Calson phosphors.

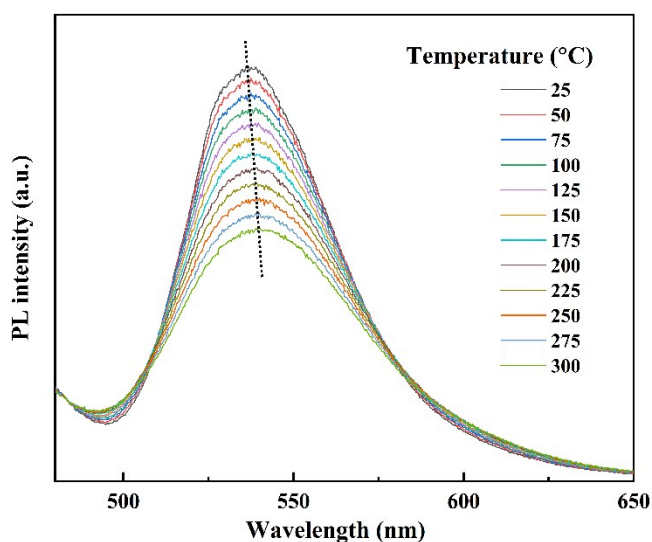

Fig. S3 Emission spectra of  $\beta$ -sialon:Eu PiG film heated at varying temperatures.

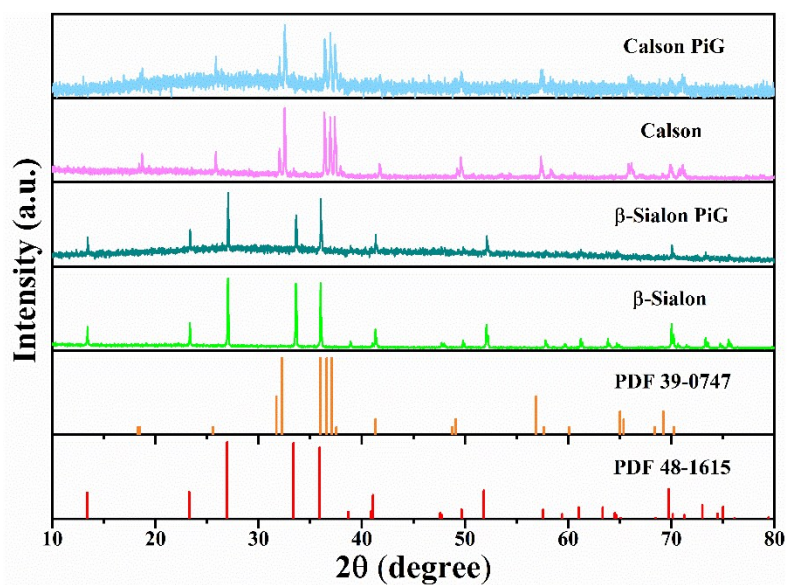

Fig. S4 XRD patterns of the phosphors, glass powder and standard patterns. PDF 39-0747, PDF 48-1615 are the standard patterns of the  $\beta$ -Sialon and the CASN.

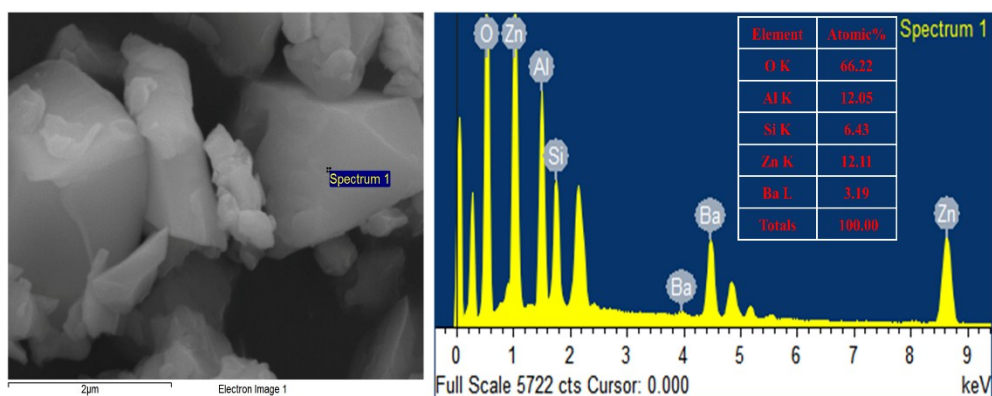

Fig. S5 The quantified elemental compositions of the glass matrix by EDS.

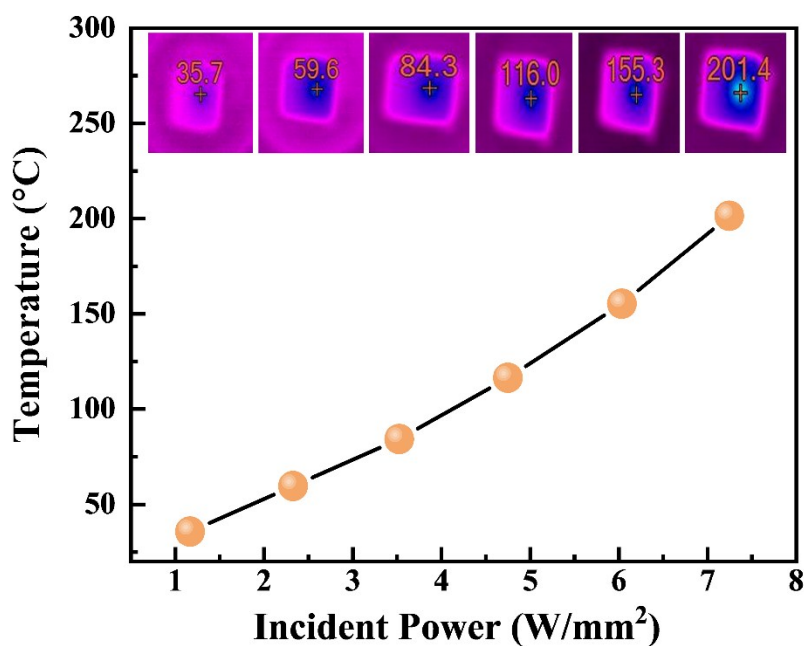

Fig. S6 The surface temperature of  $\beta$ -sialon:Eu (50 wt%) PiG film fixed at 80  $\mu\text{m}$  under the increasing laser power density.

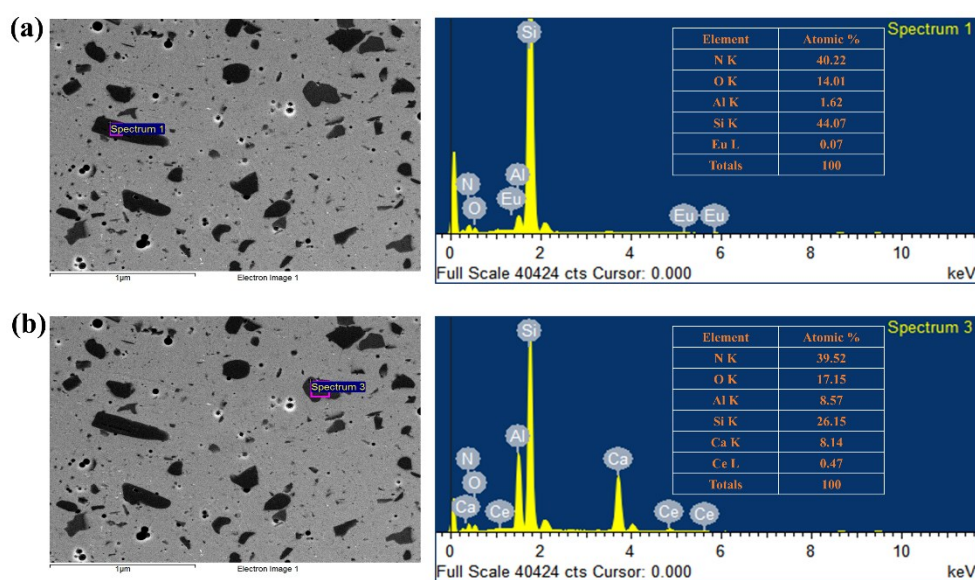

Fig. S7 The quantified elemental compositions of the G+O simple by EDS.

Tab. S1 Optical properties of the O/G ( $\lambda_{\text{em}} = 525 \text{ nm}$ ) double-layer PiG film (90  $\mu\text{m}$ ) with increasing the incident laser power.

| Laser power /W | Power density /Wmm <sup>-2</sup> | Luminous flux/lm | Luminous efficacy /lmW <sup>-1</sup> | X      | Y      | CCT /K |
|----------------|----------------------------------|------------------|--------------------------------------|--------|--------|--------|
| 0.94           | 1.19                             | 41.76            | 44.33                                | 0.32   | 0.3679 | 5983   |
| 1.92           | 2.44                             | 81.33            | 42.36                                | 0.3171 | 0.3542 | 6151   |
| 2.82           | 3.59                             | 111.48           | 39.43                                | 0.3137 | 0.342  | 6368   |
| 3.79           | 4.82                             | 136.84           | 36.10                                | 0.3086 | 0.3288 | 6733   |
| 4.79           | 6.09                             | 149.82           | 31.27                                | 0.3001 | 0.3123 | 7482   |
| 5.76           | 7.33                             | 144.95           | 25.16                                | 0.291  | 0.2959 | 8618   |
